# Supplementary material for: Poly(Lactic Acid) Composites with Lignin and Nanolignin Synthesized by In Situ Reactive Processing
Source: MDPI journal article supplement (doi:10.3390/polym15102386), 2023-05-19
Supplement: s1 [file s1]

## Article

# Poly(lactic acid) Composites with Lignin and Nanolignin Synthesized by In-Situ Reactive Processing

Sofia Makri <sup>1,2</sup>, Eleftheria Xanthopoulou <sup>2</sup>, Miguel Angel Valera <sup>3</sup>, Ana Mangas <sup>3</sup>, Giacomo Marra <sup>3</sup>, Víctor Ruiz <sup>3</sup>, Savvas Koltsakidis <sup>4</sup>, Dimitrios Tzetzis <sup>4</sup>, Alexandros Zoikis Karathanasis <sup>1</sup>, Ioanna Deligkiozi <sup>1</sup>, Nikolaos Nikolaidis <sup>2</sup>, Dimitrios Bikiaris <sup>2\*</sup> and Zoi Terzopoulou <sup>2\*</sup>

<sup>1</sup> Creative Nano PC, 43 Tatoiou, Metamorfosi, 14451 Athens, Greece

<sup>2</sup> Laboratory of Polymer and Colors Chemistry and Technology, Department of Chemistry, Aristotle University of Thessaloniki, 54124 Thessaloniki, Greece

<sup>3</sup> AIMPLAS, Asociación de Investigación de Materiales Plásticos Y Conexas, Carrer de Gustave Eiffel, 4, 46980 Paterna, Valencia, Spain

<sup>4</sup> Digital Manufacturing and Materials Characterization Laboratory, School of Science and Technology, International Hellenic University, 14 km Thessaloniki, 57001 N. Moudania, Greece

\* Correspondence: [terzozoi@chem.auth.gr](mailto:terzozoi@chem.auth.gr); [dbic@chem.auth.gr](mailto:dbic@chem.auth.gr)

## Supplementary Materials

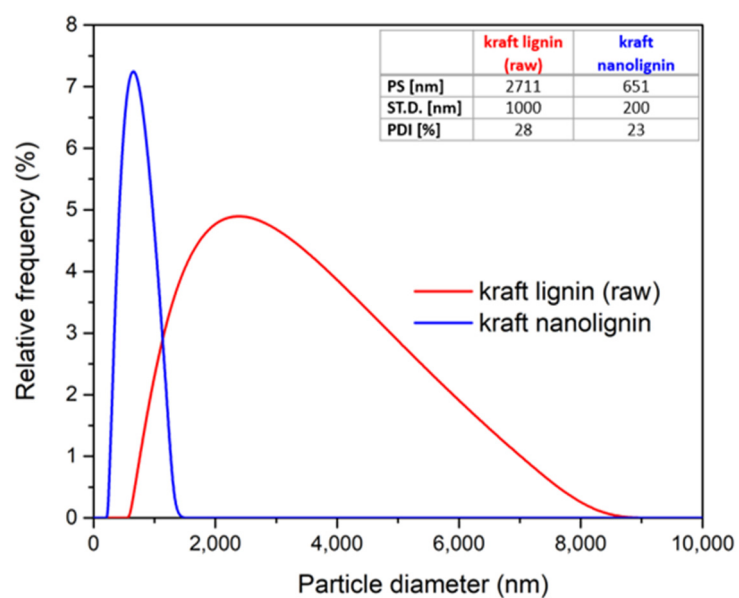

(a)

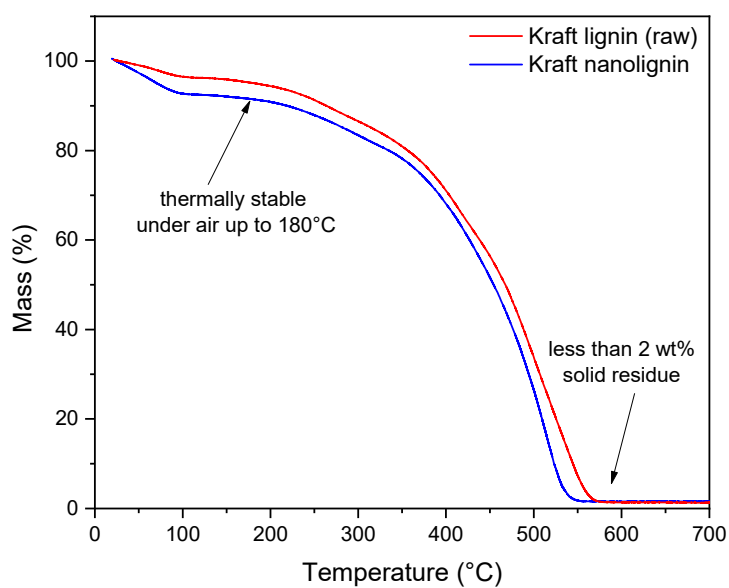

(b)

Figure S1. (a) Particle size distribution curves and (b) TGA curves of kraft lignin and nanolignin.

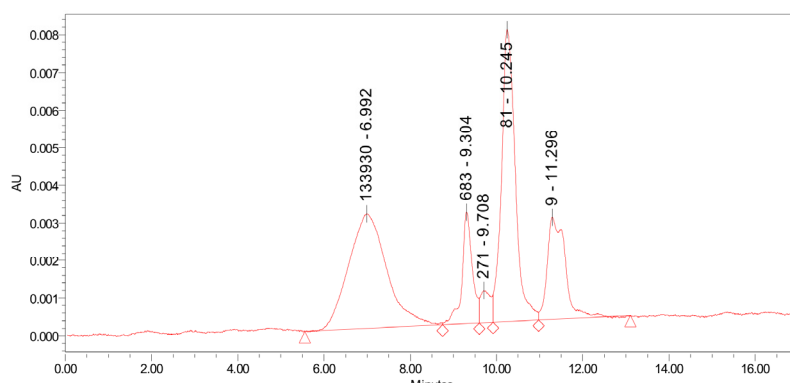

PLA ROP

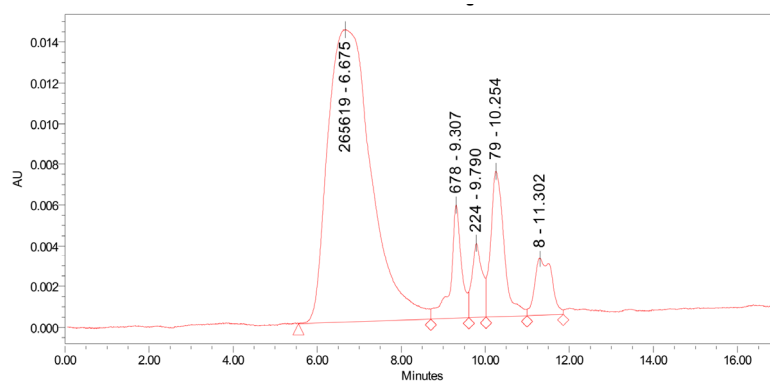

PLA ROP L

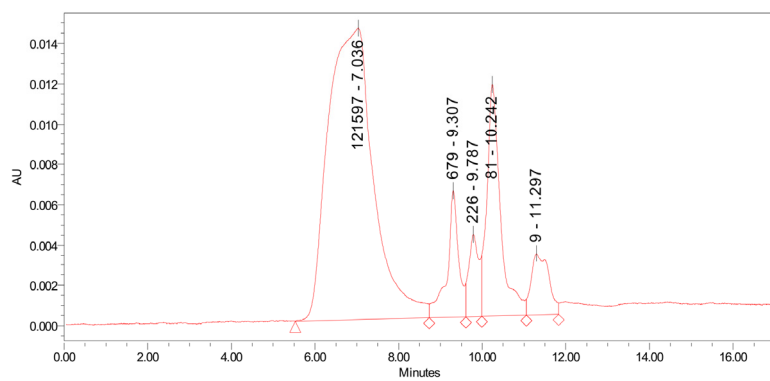

PLA ROP L C

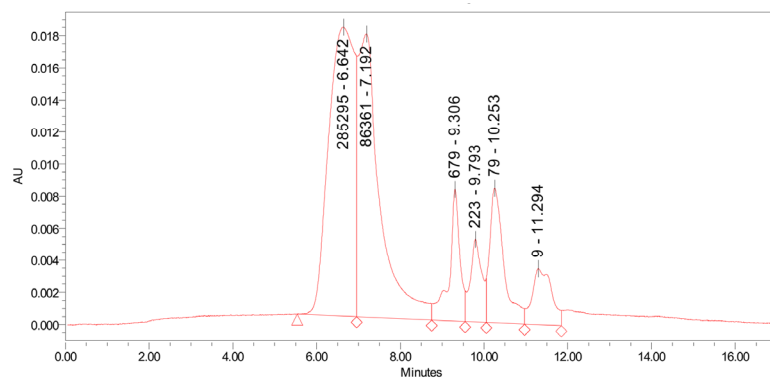

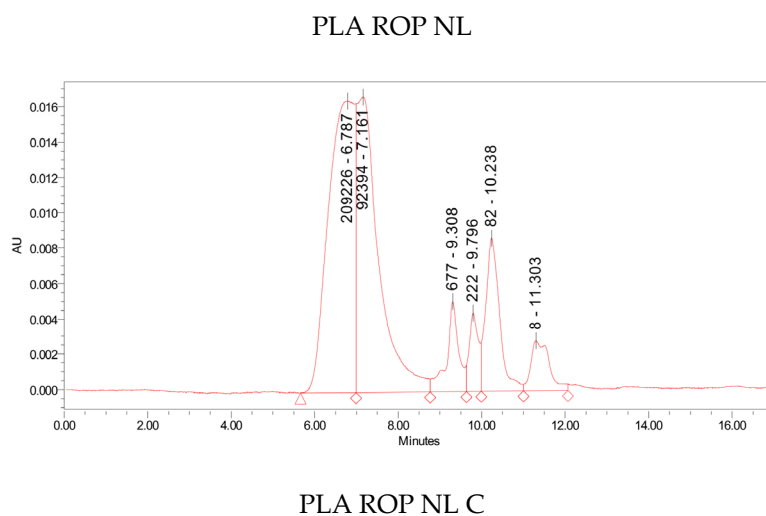

Figure S2. GPC chromatographs of PLA and its composites with lignin and nanolignin prepared by reactive processing.

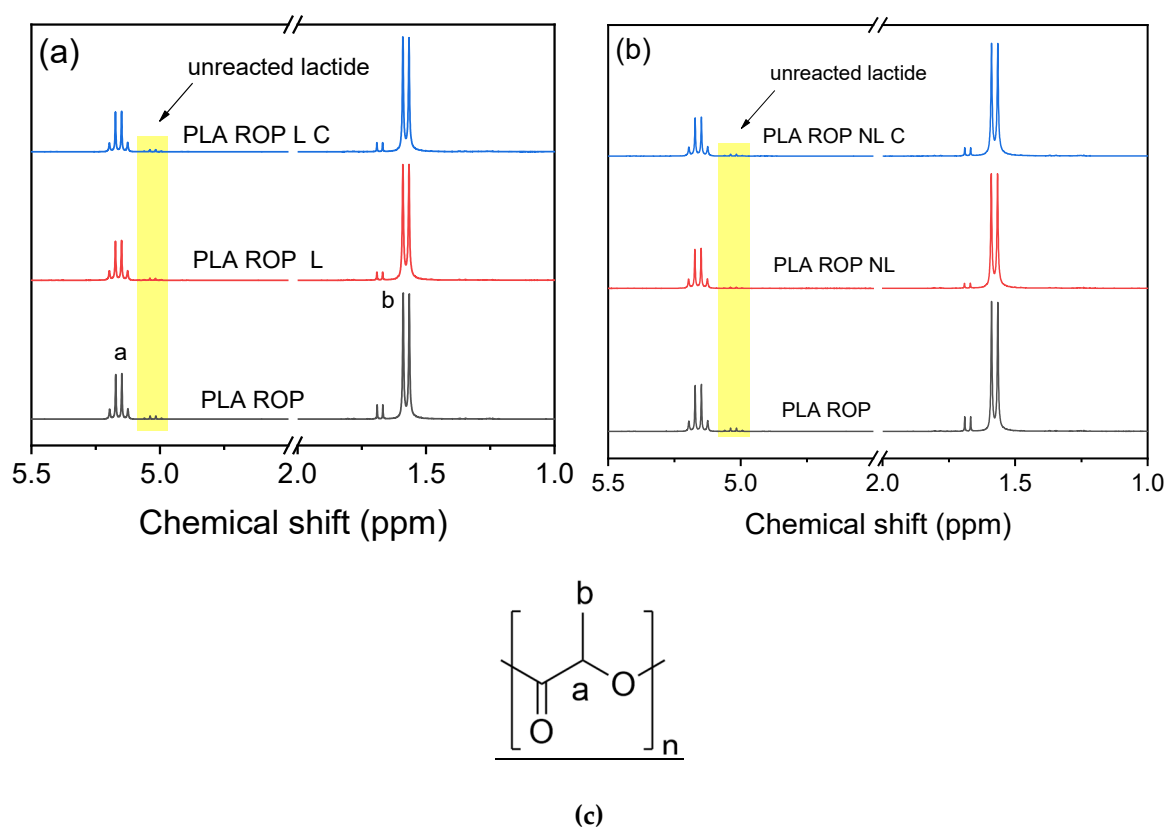

Figure S3.  $^1\text{H}$  NMR spectra of ROP PLA with 0.5% (a) lignin (b) nanolignin, (c) peak assignments.

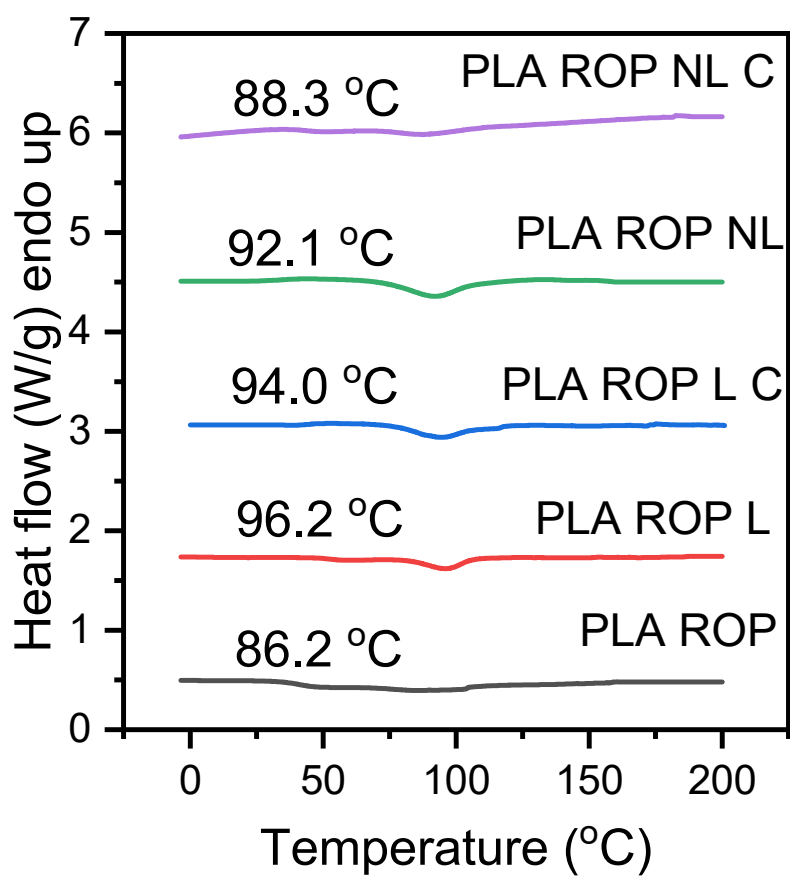

Figure S4. Cooling DSC scans of the PLA ROP composites (rate 10 °C/min).

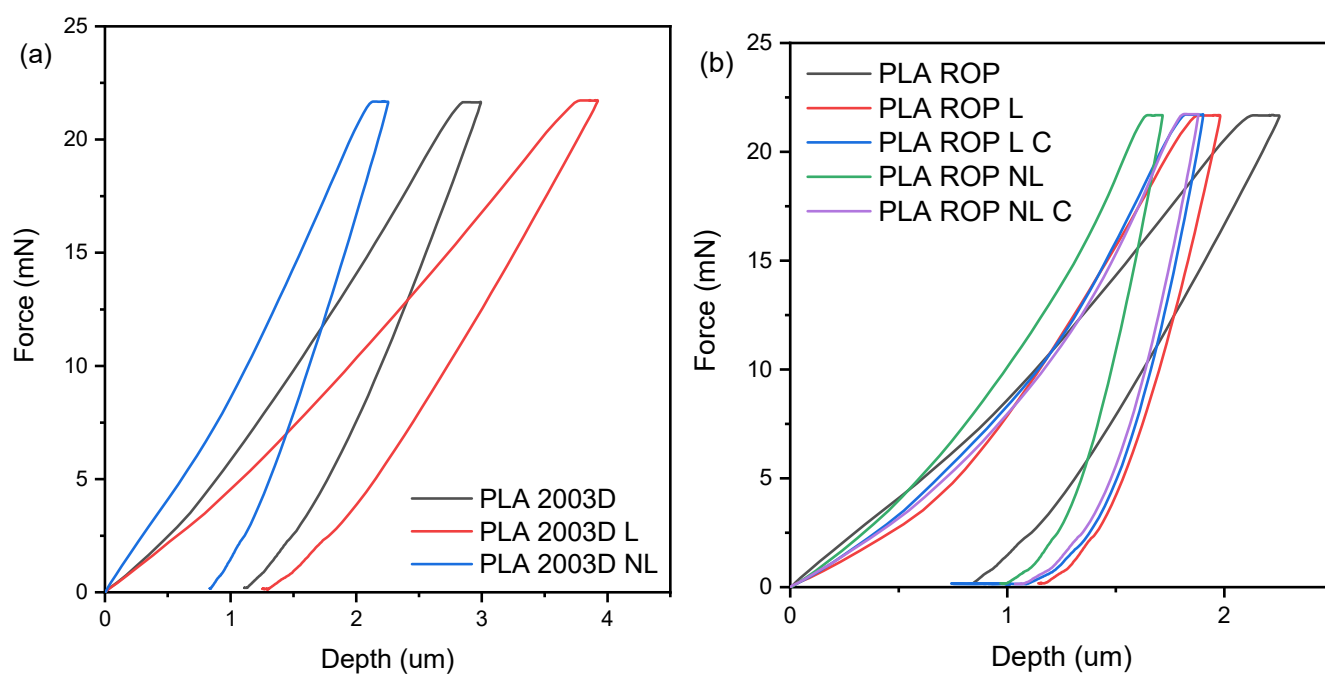

Figure S5. Force-depth curves of PLA composites with lignin and nanolignin prepared by (a) melt compounding and (b) reacting processing.
